# Supplementary material for: Quantifying the impacts of human water use and climate variations on recent drying of Lake Urmia basin: the value of different sets of spaceborne and in situ data for calibrating a global hydrological model
Source: Copernicus journal article supplement (doi:10.5194/hess-24-1939-2020), 2020-04-17
Supplement: Supplementary file 1 [file Data.xlsx]

## Sheet: Irrigated area data 
	Irrigated area in Lake Urmia basin [km2]
	Year	MODIS (data from Kamali and Houneszadeh Jalili, 2015)	WaterGAP
	2003	4450	4955		Reference:	Kamali, M., and Youneszadeh Jalili, S.: Investigation of landuse changes in Lake Urmia Basin using remotely sensed images, 30 Report of Urmia Lake Restoration Program (ULRP) (In Persian), 2015.
	2004	4000	5038		Note:	Kamali and Youneszadeh Jalili (2015) estimated annual time series of irrigated areas in Lake Urmia basin from 2001 to 2012. Considering that water management in the basin aims at preventing any increase of irrigated areas, it is assumed that irrigated area in 2013 remained at the 2012 value
	2005	4750	5120
	2006	4850	5204
	2007	4850	5289
	2008	4900	5370
	2009	5000	5370
	2010	5200	5370
	2011	6400	5370
	2012	5900	5370
	2013	5900	5370

## Sheet: Total water storage anomalies 
	GRACE total water storage anomalies in Lake Urmia basin
	Year	Month	TWSA [mm]
	2003	1	9.48687		Reference:	Save, H., Bettadpur, S., and Tapley, B. D.: High‐resolution CSR GRACE RL05 mascons, Journal of Geophysical Research: Solid Earth, 121(10), 7547-7569, doi:10.1002/2016JB013007, 2016.
	2003	2	74.0816		Source:	http://www2.csr.utexas.edu/grace/RL05_mascons.html
	2003	3	146.176		Note:	a linear interpolation was applied for filling the gaps in data.
	2003	4	184.69
	2003	5	162.043
	2003	6	149.125
	2003	7	136.207
	2003	8	28.0015
	2003	9	-32.3179
	2003	10	-58.3719
	2003	11	2.94108
	2003	12	-11.8578
	2004	1	63.8527
	2004	2	155.365
	2004	3	131.368
	2004	4	126.868
	2004	5	170.617
	2004	6	103.212
	2004	7	66.7929
	2004	8	39.8106
	2004	9	-3.32086
	2004	10	-53.8676
	2004	11	-39.818
	2004	12	28.165
	2005	1	47.0817
	2005	2	128.088
	2005	3	135.826
	2005	4	141.465
	2005	5	165.753
	2005	6	107.046
	2005	7	57.9938
	2005	8	16.6259
	2005	9	-22.9284
	2005	10	-62.6651
	2005	11	-24.2963
	2005	12	-14.0696
	2006	1	18.5512
	2006	2	137.696
	2006	3	145.083
	2006	4	150.783
	2006	5	146.53
	2006	6	84.6402
	2006	7	16.4238
	2006	8	-68.9319
	2006	9	-73.53
	2006	10	-70.6495
	2006	11	-18.8628
	2006	12	0.949895
	2007	1	2.47973
	2007	2	33.7738
	2007	3	65.97
	2007	4	123.746
	2007	5	134.261
	2007	6	47.2868
	2007	7	35.9954
	2007	8	-28.199
	2007	9	-77.8531
	2007	10	-92.8704
	2007	11	-96.572
	2007	12	-57.1338
	2008	1	-51.0087
	2008	2	-5.15204
	2008	3	33.8751
	2008	4	-1.46992
	2008	5	-11.5059
	2008	6	-33.1117
	2008	7	-108.616
	2008	8	-116.378
	2008	9	-190.105
	2008	10	-160.298
	2008	11	-143.59
	2008	12	-138.617
	2009	1	-87.2909
	2009	2	-77.2245
	2009	3	-22.8726
	2009	4	-14.1247
	2009	5	-38.3182
	2009	6	-40.1055
	2009	7	-85.7198
	2009	8	-160.148
	2009	9	-138.848
	2009	10	-166.559
	2009	11	-133.32
	2009	12	-134.02
	2010	1	-82.7686
	2010	2	2.87515
	2010	3	31.1774
	2010	4	-2.03556
	2010	5	36.7861
	2010	6	-4.19958
	2010	7	-57.9502
	2010	8	-97.0952
	2010	9	-198.738
	2010	10	-190.11
	2010	11	-181.324
	2010	12	-156.331
	2011	1	-124.372
	2011	2	-92.4126
	2011	3	-71.6136
	2011	4	-15.1971
	2011	5	-26.2871
	2011	6	-62.3611
	2011	7	-98.4351
	2011	8	-139.263
	2011	9	-248.024
	2011	10	-179.813
	2011	11	-184.833
	2011	12	-165.783
	2012	1	-128.555
	2012	2	-70.4094
	2012	3	-24.8112
	2012	4	-26.9928
	2012	5	-55.8645
	2012	6	-84.7361
	2012	7	-89.5203
	2012	8	-208.837
	2012	9	-199.928
	2012	10	-203.429
	2012	11	-206.929
	2012	12	-129.864
	2013	1	-64.1736
	2013	2	-55.5344
	2013	3	-49.3205
	2013	4	-43.1066
	2013	5	-66.9236
	2013	6	-60.0074
	2013	7	-117.219
	2013	8	-165.542
	2013	9	-213.864
	2013	10	-262.187
	2013	11	-227.714
	2013	12	-163.081

## Sheet: Inflow into Lake Urmia
	Year	Inflow into Lake Urmia [106 m3]
	2003	5845
	2004	3662
	2005	2912
	2006	2464
	2007	3692
	2008	953
	2009	1036
	2010	2207
	2011	1792
	2012	2304
	2013	1811

## Sheet: Lake water level
	Year	Month	Day	Water table elevation of Lake Urmia [m]
	2003	1	4	1273
	2003	2	8	1273		Reference:	Tourian, M. J., Elmi, O., Chen, Q., Devaraju, B., Roohi, S., and Sneeuw, N.: A spaceborne multisensor approach to monitor the desiccation of Lake Urmia in Iran, Remote Sensing of Environment, 156, 349-360, doi:10.1016/j.rse.2014.10.006, 2015.
	2003	3	2	1272.7		Source:	http://hydrosat.gis.uni-stuttgart.de/php/index.php
	2003	4	6	1272.8		Note:	a linear interpolation was applied for filling the gaps in data.
	2003	4	19	1273.4
	2003	5	11	1273.8
	2003	5	24	1273.7
	2003	6	15	1273.6
	2003	6	28	1274.2
	2003	7	20	1273.5
	2003	8	2	1273.5
	2003	8	24	1273.2
	2003	9	28	1273.1
	2003	10	11	1273.5
	2003	11	2	1273
	2003	11	15	1273.2
	2003	12	20	1273.1
	2004	1	11	1273.2
	2004	1	24	1273.2
	2004	2	15	1272.8
	2004	2	28	1273.7
	2004	3	21	1273.2
	2004	4	3	1273.2
	2004	4	25	1273.2
	2004	5	8	1273.7
	2004	5	30	1273.5
	2004	6	12	1273.6
	2004	7	4	1273.2
	2004	7	17	1273.5
	2004	8	8	1273.1
	2004	8	21	1273.3
	2004	9	12	1273.1
	2004	9	25	1273.4
	2004	10	17	1273
	2004	10	30	1273.3
	2004	11	21	1272.7
	2004	12	26	1272.8
	2005	1	8	1273.2
	2005	1	30	1272.9
	2005	2	12	1273.2
	2005	3	6	1273
	2005	3	19	1273.2
	2005	4	10	1273.2
	2005	4	23	1273.7
	2005	5	28	1273.5
	2005	6	19	1273
	2005	7	2	1273.2
	2005	7	24	1273
	2005	8	6	1273
	2005	8	28	1272.7
	2005	9	10	1273
	2005	10	2	1272.7
	2005	10	15	1272.7
	2005	11	6	1272.6
	2005	11	19	1272.9
	2005	12	11	1272.6
	2005	12	24	1272.7
	2006	1	15	1272.6
	2006	1	28	1272.7
	2006	2	19	1272.9
	2006	3	4	1272.8
	2006	3	26	1272.8
	2006	4	8	1272.9
	2006	4	30	1272.9
	2006	5	13	1273.1
	2006	6	4	1273
	2006	6	17	1273.1
	2006	7	9	1272.6
	2006	7	22	1272.7
	2006	8	13	1272.5
	2006	8	26	1272.7
	2006	9	17	1272.4
	2006	9	30	1272.4
	2006	10	22	1272.2
	2006	11	4	1272.5
	2006	11	26	1272.6
	2006	12	9	1272.6
	2006	12	31	1272.5
	2007	1	13	1272.6
	2007	2	4	1272.3
	2007	3	24	1272.6
	2007	4	15	1272.7
	2007	4	28	1272.8
	2007	5	20	1273
	2007	6	2	1272.9
	2007	6	24	1272.5
	2007	7	7	1273.1
	2007	7	29	1272.7
	2007	8	11	1272.5
	2007	9	2	1272.6
	2007	9	15	1272.3
	2007	10	7	1272.2
	2007	10	20	1272.4
	2007	11	11	1272.1
	2007	11	24	1272.3
	2007	12	16	1272.1
	2007	12	29	1272.2
	2008	1	20	1272.3
	2008	2	2	1272.2
	2008	2	24	1272.3
	2008	3	8	1272.6
	2008	3	30	1272.2
	2008	4	12	1272.6
	2008	5	4	1272.1
	2008	5	17	1272.2
	2008	6	8	1271.9
	2008	6	21	1271.9
	2008	7	13	1271.7
	2008	7	26	1272.2
	2008	8	17	1271.6
	2008	8	30	1271.5
	2008	9	21	1271.5
	2008	10	4	1272
	2008	11	30	1271.4
	2008	12	13	1271.9
	2009	1	4	1271.7
	2009	1	17	1271.8
	2009	2	8	1271.6
	2009	2	21	1271.4
	2009	3	15	1271.3
	2009	3	28	1271.5
	2009	4	19	1271.4
	2009	5	2	1271.5
	2009	5	24	1271.4
	2009	6	6	1271.3
	2009	6	28	1271.1
	2009	7	11	1271.5
	2009	8	2	1271
	2009	8	15	1271
	2009	9	6	1271.1
	2009	9	19	1270.9
	2009	10	11	1271.1
	2009	10	24	1271.2
	2009	11	15	1271
	2009	11	28	1271.4
	2009	12	20	1271
	2010	1	2	1271
	2010	1	24	1270.8
	2010	2	6	1271
	2010	2	28	1270.9
	2010	3	13	1271.1
	2010	4	4	1271
	2010	4	17	1271.1
	2010	5	9	1271.2
	2010	5	22	1271.3
	2010	6	13	1271
	2010	6	26	1271
	2010	7	18	1270.8
	2010	7	31	1270.9
	2010	8	22	1270.8
	2010	9	4	1270.7
	2010	10	9	1270.7
	2010	10	30	1270.7
	2010	11	29	1271
	2010	12	29	1270.9
	2011	1	28	1270.7
	2011	2	27	1270
	2011	3	29	1270.7
	2011	4	28	1270.8
	2011	5	28	1270.8
	2011	6	27	1270.3
	2011	7	27	1270.8
	2011	8	26	1270.7
	2011	9	25	1270.5
	2011	10	25	1270.7
	2011	11	24	1270.8
	2011	12	21	1270.6
	2012	3	14	1270.5
	2012	5	5	1270.3
	2012	5	9	NaN
	2012	6	3	1270.1
	2012	6	8	NaN
	2012	7	28	NaN
	2012	8	2	1269.4
	2012	8	27	1269.6
	2012	8	31	1270
	2012	9	29	1270
	2012	10	20	1270.1
	2012	10	25	1270.3
	2012	11	19	1270.3
	2012	11	23	1270.3
	2012	12	22	1270.3
	2013	1	15	1270.4
	2013	2	12	1270.6
	2013	2	16	NaN
	2013	3	17	1270.5
	2013	5	9	1270.6
	2013	5	14	1270.5
	2013	6	7	NaN
	2013	6	12	1270
	2013	8	2	1270.1
	2013	8	7	1270
	2013	8	31	1270.3
	2013	9	4	1270.2
	2013	10	3	NaN
	2013	11	23	1270
	2013	11	28	1269.9
	2013	12	15	NaN

## Sheet: Lake surface water extent
	Year	Month	Day	Surface Water Extent of Lake Urmia [106 m2]
	2003	1	1	4171.3
	2003	1	17	3983.4		Reference:	Tourian, M. J., Elmi, O., Chen, Q., Devaraju, B., Roohi, S., and Sneeuw, N.: A spaceborne multisensor approach to monitor the desiccation of Lake Urmia in Iran, Remote Sensing of Environment, 156, 349-360, doi:10.1016/j.rse.2014.10.006, 2015.
	2003	1	25	3989.2		Source:	http://hydrosat.gis.uni-stuttgart.de/php/index.php
	2003	2	2	3952.2		Note:	a linear interpolation was applied for filling the gaps in data.
	2003	2	10	4117.2
	2003	2	18	4024.8
	2003	2	26	4080.1
	2003	3	6	4160.6
	2003	3	14	4311
	2003	3	22	4357.1
	2003	3	30	4327.8
	2003	4	7	4376.3
	2003	4	15	4419.9
	2003	4	23	4541.5
	2003	5	1	4536.2
	2003	5	9	4468.7
	2003	5	17	4257.6
	2003	5	25	4267.4
	2003	6	2	4194.7
	2003	6	10	4379.1
	2003	6	18	4304.8
	2003	6	26	4398.8
	2003	7	4	4300.2
	2003	7	12	4080.8
	2003	7	20	4064.7
	2003	7	28	4073
	2003	8	5	4303.4
	2003	8	13	4296.7
	2003	8	21	4324.1
	2003	8	29	4306.2
	2003	9	6	4284.2
	2003	9	14	4266.8
	2003	9	22	4256.5
	2003	9	30	4247.1
	2003	10	8	4240.9
	2003	10	16	4117.7
	2003	10	24	4122.3
	2003	11	1	4126.2
	2003	11	9	4248.5
	2003	11	17	4309.3
	2003	12	3	4370.9
	2003	12	11	4308.8
	2003	12	27	4292.2
	2004	1	1	4265.4
	2004	1	9	4375.9
	2004	1	17	4396.3
	2004	1	25	4399
	2004	2	2	4426.4
	2004	2	10	4418.1
	2004	2	18	4211.4
	2004	2	26	4227.3
	2004	3	5	4236.1
	2004	3	13	4470.6
	2004	3	21	4471.1
	2004	3	29	4462.1
	2004	4	6	4451.5
	2004	4	14	4429
	2004	4	22	4446.8
	2004	4	30	4472.9
	2004	5	8	4475.7
	2004	5	16	4471.7
	2004	5	24	4470.1
	2004	6	1	4454.3
	2004	6	9	4445.4
	2004	6	17	4406.9
	2004	6	25	4389.8
	2004	7	3	4360.3
	2004	7	11	4346.8
	2004	7	19	4326.6
	2004	7	27	4320.6
	2004	8	4	4313.8
	2004	8	12	4305.5
	2004	8	20	4293.2
	2004	8	28	4267.7
	2004	9	5	4242.5
	2004	9	13	4228.6
	2004	9	21	4210.1
	2004	9	29	4195.4
	2004	10	7	4170.5
	2004	10	15	4176.2
	2004	10	23	4175.6
	2004	10	31	4196.7
	2004	11	8	4256.5
	2004	11	16	4283.8
	2004	11	24	4295.3
	2004	12	2	4264.2
	2004	12	10	4248.2
	2004	12	18	4237.8
	2004	12	26	4244.7
	2005	1	1	4256.8
	2005	1	9	4257.3
	2005	1	17	4247.1
	2005	2	2	4321.5
	2005	2	10	4412.9
	2005	2	18	4482.5
	2005	2	26	4495.1
	2005	3	6	4471.1
	2005	3	14	4452.3
	2005	3	22	4393.9
	2005	3	30	4392.2
	2005	4	7	4398.5
	2005	4	15	4428.8
	2005	4	23	4418.9
	2005	5	1	4404.2
	2005	5	9	4411.9
	2005	5	17	4386.4
	2005	5	25	4376.5
	2005	6	2	4341.4
	2005	6	10	4340.6
	2005	6	18	4309.4
	2005	6	26	4296.3
	2005	7	4	4283.7
	2005	7	12	4208.8
	2005	7	20	4191.5
	2005	7	28	4171.3
	2005	8	5	4217.8
	2005	8	13	4204.1
	2005	8	21	4185.6
	2005	8	29	4160.7
	2005	9	6	4137.8
	2005	9	14	4117.3
	2005	9	22	4107.2
	2005	9	30	4094
	2005	10	8	4083.6
	2005	10	16	4080.2
	2005	10	24	4068.7
	2005	11	1	4068.1
	2005	11	9	4066.9
	2005	11	17	4076.1
	2005	11	25	4082.9
	2005	12	3	4086.6
	2005	12	11	4097.3
	2005	12	19	4093.2
	2005	12	27	4070.3
	2006	1	1	4068.8
	2006	1	9	4073.8
	2006	1	17	4103.9
	2006	1	25	4113.6
	2006	2	2	4132.8
	2006	2	10	4170.1
	2006	2	18	4200.2
	2006	2	26	4228.1
	2006	3	6	4237.3
	2006	3	14	4244.4
	2006	3	22	4251.5
	2006	3	30	4266.6
	2006	4	7	4288.9
	2006	4	15	4315.2
	2006	4	23	4310
	2006	5	1	4341
	2006	5	9	4332.4
	2006	5	17	4343.2
	2006	5	25	4260.7
	2006	6	2	4231.2
	2006	6	10	4173.3
	2006	6	18	4173.8
	2006	6	26	4140.8
	2006	7	4	4120.1
	2006	7	12	4097.4
	2006	7	20	4040.8
	2006	7	28	4047.4
	2006	8	5	4037.1
	2006	8	13	4063.2
	2006	8	21	4039.9
	2006	8	29	4016.9
	2006	9	6	4010.1
	2006	9	14	3991.4
	2006	9	22	3977.2
	2006	9	30	3950.6
	2006	10	8	3944
	2006	10	16	3946.7
	2006	10	24	3999.1
	2006	11	1	4042.6
	2006	11	9	4074.9
	2006	11	17	4077.9
	2006	11	25	4075
	2006	12	3	4090.8
	2006	12	11	4098.1
	2006	12	19	4165.3
	2006	12	27	4192.7
	2007	1	1	4166.9
	2007	1	17	4095.7
	2007	1	25	4078.6
	2007	2	2	4064.8
	2007	2	10	4084
	2007	2	18	4081.8
	2007	2	26	4137.8
	2007	3	6	4162.6
	2007	3	14	4171.9
	2007	3	22	4176.5
	2007	3	30	4179.7
	2007	4	7	4195.3
	2007	4	15	4224.3
	2007	4	23	4239
	2007	5	1	4058.2
	2007	5	9	4014.1
	2007	5	17	3993.8
	2007	5	25	4172.9
	2007	6	2	4194.6
	2007	6	10	4169.5
	2007	6	18	4153.7
	2007	6	26	4089.4
	2007	7	4	4035.1
	2007	7	12	4006.7
	2007	7	20	4008
	2007	7	28	4052.5
	2007	8	5	4049.1
	2007	8	13	4050.5
	2007	8	21	4031.6
	2007	8	29	4014.9
	2007	9	6	4000
	2007	9	14	3984.5
	2007	9	22	3960.9
	2007	9	30	3951.8
	2007	10	8	3932.5
	2007	10	16	3931.9
	2007	10	24	3921.8
	2007	11	1	3915.6
	2007	11	9	3908.2
	2007	11	17	3913
	2007	11	25	3933
	2007	12	3	3940.5
	2007	12	11	3938.9
	2007	12	19	3843.2
	2007	12	27	3867
	2008	1	1	3872.1
	2008	1	9	3956.4
	2008	1	17	3926.3
	2008	1	25	3920.6
	2008	2	2	4061.2
	2008	2	10	4073.7
	2008	2	18	4090.7
	2008	2	26	3969.4
	2008	3	5	3989.7
	2008	3	13	3983.6
	2008	3	21	3990.7
	2008	3	29	3975.5
	2008	4	6	3975
	2008	4	14	3953
	2008	4	22	3885.2
	2008	4	30	3826.3
	2008	5	8	3796.1
	2008	5	16	3833
	2008	5	24	3851.8
	2008	6	1	3835.6
	2008	6	9	3807.5
	2008	6	17	3717.3
	2008	6	25	3698.3
	2008	7	3	3659.3
	2008	7	11	3704.8
	2008	7	19	3684.1
	2008	7	27	3669.5
	2008	8	4	3637.4
	2008	8	12	3600.5
	2008	8	20	3564.8
	2008	8	28	3522.3
	2008	9	5	3494.6
	2008	9	13	3477.2
	2008	9	21	3472.4
	2008	9	29	3467
	2008	10	7	3457.3
	2008	10	15	3448
	2008	10	23	3462.8
	2008	10	31	3373.4
	2008	11	8	3395.1
	2008	11	16	3393.7
	2008	11	24	3508.9
	2008	12	2	3510.3
	2008	12	10	3515
	2008	12	18	3516.7
	2008	12	26	3531.3
	2009	1	1	3526.4
	2009	1	9	3489.9
	2009	1	17	3464
	2009	1	25	3450.7
	2009	2	2	3460.1
	2009	2	10	3453.9
	2009	2	18	3451.3
	2009	2	26	3448.3
	2009	3	6	3464.9
	2009	3	14	3480.6
	2009	3	22	3499.1
	2009	3	30	3500.7
	2009	4	7	3440
	2009	4	15	3448.9
	2009	4	23	3453.9
	2009	5	1	3521.9
	2009	5	9	3523.5
	2009	5	17	3506.4
	2009	5	25	3423.6
	2009	6	2	3390.5
	2009	6	10	3369.2
	2009	6	18	3398.3
	2009	6	26	3230.4
	2009	7	4	3153.5
	2009	7	12	3010.2
	2009	7	20	3024.5
	2009	7	28	2893.2
	2009	8	5	2908.6
	2009	8	13	2910.2
	2009	8	21	2951.2
	2009	8	29	2910.8
	2009	9	6	2868.6
	2009	9	14	2853.9
	2009	9	22	2848.1
	2009	9	30	2744
	2009	10	8	2721.9
	2009	10	16	2635.7
	2009	10	24	2760
	2009	11	1	2805.3
	2009	11	9	2937.9
	2009	11	17	2970
	2009	11	25	2981.9
	2009	12	3	2994.5
	2009	12	11	2995.8
	2009	12	19	3021.7
	2009	12	27	3028.6
	2010	1	1	3049.6
	2010	1	9	3086.6
	2010	1	17	3199.4
	2010	1	25	3227.3
	2010	2	2	3202.4
	2010	2	10	3111.1
	2010	2	18	3101.4
	2010	3	6	2976.9
	2010	3	14	3057.5
	2010	3	30	3121.2
	2010	4	7	3321.5
	2010	4	15	3334.1
	2010	4	23	3347.3
	2010	5	1	3423.1
	2010	5	9	3460.4
	2010	5	17	3490.4
	2010	5	25	3422.3
	2010	6	2	3271.1
	2010	6	10	3195.9
	2010	6	18	3216.2
	2010	6	26	3234.2
	2010	7	4	3149
	2010	7	12	3011.4
	2010	7	20	2974.1
	2010	7	28	2951.8
	2010	8	5	2896.3
	2010	8	13	2833.2
	2010	8	21	2799.5
	2010	8	29	2770.5
	2010	9	6	2720.4
	2010	9	14	2624.4
	2010	9	22	2427.8
	2010	9	30	2375.7
	2010	10	8	2370.2
	2010	10	16	2495.7
	2010	10	24	2484.8
	2010	11	1	2473.8
	2010	11	9	2445.1
	2010	11	17	2432.9
	2010	11	25	2419.6
	2010	12	3	2312.6
	2010	12	11	2309.8
	2010	12	19	2319
	2010	12	27	2407.4
	2011	1	9	2323.9
	2011	1	17	2278.5
	2011	1	25	2316.8
	2011	2	2	2427.8
	2011	2	10	2352.3
	2011	2	18	2435.2
	2011	2	26	2394
	2011	3	6	2668.4
	2011	3	14	2696.5
	2011	3	22	2861.4
	2011	3	30	2691
	2011	4	7	2700.6
	2011	4	15	2774.8
	2011	4	23	3032.2
	2011	5	1	3192.3
	2011	5	9	3178.2
	2011	5	17	3205.7
	2011	5	25	3056.2
	2011	6	2	3060.9
	2011	6	10	2903.4
	2011	6	18	2903.4
	2011	6	26	2776.3
	2011	7	4	2756.5
	2011	7	12	2597.6
	2011	7	20	2568.4
	2011	7	28	2495.3
	2011	8	5	2501.3
	2011	8	13	2431.3
	2011	8	21	2392.9
	2011	8	29	2356
	2011	9	6	2318.4
	2011	9	14	2268.5
	2011	9	22	2198.9
	2011	9	30	2146.5
	2011	10	8	2096.2
	2011	10	16	2091.2
	2011	10	24	2126.6
	2011	11	1	2198.1
	2011	11	9	2187.7
	2011	11	17	2201
	2011	11	25	2157.6
	2011	12	3	2182.9
	2011	12	11	2111.5
	2011	12	19	2152.6
	2011	12	27	2169.5
	2012	1	1	2213
	2012	1	9	2186.1
	2012	1	17	2183.3
	2012	2	2	2155
	2012	2	10	2138.3
	2012	2	18	2132.9
	2012	2	26	2145.7
	2012	3	5	2144.3
	2012	3	13	2174.7
	2012	3	21	2171.3
	2012	3	29	2193.2
	2012	4	6	2401.8
	2012	4	14	2683.3
	2012	4	22	2752.7
	2012	4	30	2750.1
	2012	5	8	2746.5
	2012	5	16	2842.3
	2012	5	24	2769.4
	2012	6	1	2671.4
	2012	6	9	2539.8
	2012	6	17	2431.2
	2012	6	25	2291.1
	2012	7	11	2213.2
	2012	7	27	2142.9
	2012	8	4	2075
	2012	8	12	2057.6
	2012	8	20	1980.9
	2012	8	28	1938.2
	2012	9	5	1873.4
	2012	9	13	1842.4
	2012	9	21	1790.8
	2012	9	29	1732.4
	2012	10	7	1686.9
	2012	10	15	1627.2
	2012	10	23	1618.3
	2012	10	31	1680.5
	2012	11	8	1811.2
	2012	11	16	1995.8
	2012	11	24	2038.8
	2012	12	2	2000.9
	2012	12	10	2021.3
	2012	12	18	2215.1
	2012	12	26	2439.6
	2013	1	1	2438.1
	2013	1	9	2361.6
	2013	1	17	2395.4
	2013	1	25	2515.9
	2013	2	2	2642.6
	2013	2	10	2653.6
	2013	2	18	2676.4
	2013	2	26	2651.3
	2013	3	6	2679.7
	2013	3	14	2631.4
	2013	3	22	2602.7
	2013	3	30	2559.2
	2013	4	7	2630
	2013	4	15	2680.8
	2013	4	23	2665
	2013	5	1	2526.5
	2013	5	9	2496.4
	2013	5	17	2411.3
	2013	5	25	2360.6
	2013	6	2	2264
	2013	6	10	2215
	2013	6	18	2206.3
	2013	6	26	2128.3
	2013	7	4	2095.4
	2013	7	12	2041.7
	2013	7	20	1984.2
	2013	7	28	1910.1
	2013	8	5	1835.6
	2013	8	13	1766.7
	2013	8	21	1686.6
	2013	8	29	1642.7
	2013	12	3	1525.7
	2013	12	11	1512.5
	2013	12	19	1488.6

## Sheet: Lake volume
	Year	Month	Day	Water volume of Lake Urmia [109 m3]
	2003	1	4	8.65
	2003	2	8	9.48		Reference:	Tourian, M. J., Elmi, O., Chen, Q., Devaraju, B., Roohi, S., and Sneeuw, N.: A spaceborne multisensor approach to monitor the desiccation of Lake Urmia in Iran, Remote Sensing of Environment, 156, 349-360, doi:10.1016/j.rse.2014.10.006, 2015.
	2003	3	2	6.81		Note:	a linear interpolation was applied for filling the gaps in data.
	2003	4	6	8.37
	2003	4	19	10.95
	2003	5	11	12.71
	2003	5	24	12.7
	2003	6	15	11.45
	2003	6	28	13.63
	2003	7	20	11.65
	2003	8	2	11.56
	2003	8	24	8.24
	2003	9	28	10.05
	2003	10	11	11.43
	2003	11	2	9.21
	2003	11	15	10.19
	2003	12	20	9.91
	2004	1	11	10.24
	2004	1	24	9.87
	2004	2	15	8.76
	2004	2	28	12.57
	2004	3	21	10.55
	2004	4	3	10.55
	2004	4	25	10.31
	2004	5	8	12.73
	2004	5	30	11.85
	2004	6	12	12.28
	2004	7	4	10.43
	2004	7	17	11.66
	2004	8	8	10.09
	2004	8	21	10.73
	2004	9	12	9.73
	2004	9	25	11.19
	2004	10	17	9.3
	2004	10	30	10.46
	2004	11	21	8.29
	2004	12	26	8.48
	2005	1	8	10.11
	2005	1	30	8.83
	2005	2	12	10.35
	2005	3	6	9.43
	2005	3	19	10.6
	2005	4	10	10.52
	2005	4	23	12.79
	2005	5	28	11.9
	2005	6	19	9.67
	2005	7	2	10.35
	2005	7	24	9.58
	2005	8	6	9.28
	2005	8	28	8.26
	2005	9	10	9.22
	2005	10	2	8.13
	2005	10	15	8.12
	2005	11	6	7.46
	2005	11	19	8.86
	2005	12	11	7.45
	2005	12	24	8
	2006	1	15	7.57
	2006	1	28	8.02
	2006	2	19	8.94
	2006	3	4	8.33
	2006	3	26	8.51
	2006	4	8	9.11
	2006	4	30	8.81
	2006	5	13	9.62
	2006	6	4	9.52
	2006	6	17	9.69
	2006	7	9	7.57
	2006	7	22	8.22
	2006	8	13	7.43
	2006	8	26	7.73
	2006	9	17	6.67
	2006	9	30	6.91
	2006	10	22	6.16
	2006	11	4	7.1
	2006	11	26	7.43
	2006	12	9	7.58
	2006	12	31	7.21
	2007	1	13	7.66
	2007	2	4	6.45
	2007	3	24	7.69
	2007	4	15	8.23
	2007	4	28	8.54
	2007	5	20	9.46
	2007	6	2	9.11
	2007	6	24	7.42
	2007	7	7	9.6
	2007	7	29	7.97
	2007	8	11	7.24
	2007	9	2	7.41
	2007	9	15	6.55
	2007	10	7	6.22
	2007	10	20	6.99
	2007	11	11	5.85
	2007	11	24	6.34
	2007	12	16	5.86
	2007	12	29	6.05
	2008	1	20	6.43
	2008	2	2	6.23
	2008	2	24	6.49
	2008	3	8	7.46
	2008	3	30	6.24
	2008	4	12	7.54
	2008	5	4	5.76
	2008	5	17	6.18
	2008	6	8	5.12
	2008	6	21	5.39
	2008	7	13	4.87
	2008	7	26	5.97
	2008	8	17	4.6
	2008	8	30	4.43
	2008	9	21	4.28
	2008	10	4	5.36
	2008	11	30	3.97
	2008	12	13	4.67
	2009	1	4	4.66
	2009	1	17	4.93
	2009	2	8	4.63
	2009	2	21	4.02
	2009	3	15	3.74
	2009	3	28	4.36
	2009	4	19	4.16
	2009	5	2	4.3
	2009	5	24	3.97
	2009	6	6	3.91
	2009	6	28	3.58
	2009	7	11	4.22
	2009	8	2	3.23
	2009	8	15	3.29
	2009	9	6	2.91
	2009	9	19	3.1
	2009	10	11	3.3
	2009	10	24	3.37
	2009	11	15	3.16
	2009	11	28	3.48
	2009	12	20	3.2
	2010	1	2	3.2
	2010	1	24	3.04
	2010	2	6	3.2
	2010	2	28	3.18
	2010	3	13	3.39
	2010	4	4	3.29
	2010	4	17	3.39
	2010	5	9	3.56
	2010	5	22	3.81
	2010	6	13	3.47
	2010	6	26	3.46
	2010	7	18	3.05
	2010	7	31	3.18
	2010	8	22	3.05
	2010	9	4	2.84
	2010	10	9	2.69
	2010	10	30	2.29
	2010	11	29	2.84
	2010	12	29	2.72
	2011	1	28	2.46
	2011	2	27	1.55
	2011	3	29	2.72
	2011	4	28	2.92
	2011	5	28	3.08
	2011	6	27	2.48
	2011	7	27	2.88
	2011	8	26	2.58
	2011	9	25	2.28
	2011	10	25	2.34
	2011	11	24	2.21
	2011	12	21	2.09
	2012	3	14	1.81
	2012	5	5	1.98
	2012	5	9	NaN
	2012	6	3	1.82
	2012	6	8	NaN
	2012	7	28	NaN
	2012	7	28	NaN
	2012	8	2	1.12
	2012	8	27	1.25
	2012	8	27	1.61
	2012	8	31	1.58
	2012	9	29	1.34
	2012	9	29	1.41
	2012	10	20	1.42
	2012	10	25	1.61
	2012	11	19	1.52
	2012	11	23	1.56
	2012	12	22	1.95
	2013	1	15	2.16
	2013	2	12	2.25
	2013	2	12	2.36
	2013	2	16	NaN
	2013	3	17	2.53
	2013	5	9	2.53
	2013	5	14	2.45
	2013	6	7	NaN
	2013	6	12	1.75
	2013	8	2	1.79
	2013	8	7	1.64
	2013	8	31	1.87
	2013	9	4	1.83
	2013	10	3	NaN
	2013	11	23	1.62
	2013	11	28	1.53
	2013	12	15	NaN

## Sheet: EWEMBI Precipitation
	Year	Month	EWEMBI Precipitation [mm]
	2003	1	24.22
	2003	2	53.84		Reference:	Lange, S.: EartH2Observe, WFDEI and ERA-Interim data Merged and Bias-corrected for ISIMIP (EWEMBI), GFZ Data Services, doi:10.5880/pik.2016.004, 2016.
	2003	3	84.71
	2003	4	88.9
	2003	5	34.33
	2003	6	17.71
	2003	7	2.1
	2003	8	5.26
	2003	9	1.84
	2003	10	21.88
	2003	11	45.63
	2003	12	48.36
	2004	1	45.16
	2004	2	33.68
	2004	3	28.03
	2004	4	78.96
	2004	5	87.08
	2004	6	14.03
	2004	7	20.46
	2004	8	0.23
	2004	9	0.74
	2004	10	8.38
	2004	11	90.87
	2004	12	18.07
	2005	1	44.23
	2005	2	45.43
	2005	3	28.75
	2005	4	61.72
	2005	5	63.47
	2005	6	7.26
	2005	7	4.96
	2005	8	6.78
	2005	9	6.85
	2005	10	8.73
	2005	11	30.99
	2005	12	21.21
	2006	1	44.87
	2006	2	82.2
	2006	3	36.5
	2006	4	77.97
	2006	5	56.44
	2006	6	3.82
	2006	7	4.58
	2006	8	2.2
	2006	9	4
	2006	10	95.28
	2006	11	38.29
	2006	12	23.55
	2007	1	22.53
	2007	2	31.7
	2007	3	46.25
	2007	4	91.46
	2007	5	43.21
	2007	6	13
	2007	7	12.68
	2007	8	8.69
	2007	9	0.54
	2007	10	6.89
	2007	11	21.54
	2007	12	28.37
	2008	1	21.35
	2008	2	47.76
	2008	3	26.46
	2008	4	13.05
	2008	5	20.54
	2008	6	7.65
	2008	7	8.36
	2008	8	2.41
	2008	9	30.88
	2008	10	68.48
	2008	11	15.64
	2008	12	13.3
	2009	1	15.97
	2009	2	19.2
	2009	3	55.22
	2009	4	52.65
	2009	5	17.12
	2009	6	31.3
	2009	7	2.22
	2009	8	1.07
	2009	9	30.63
	2009	10	24.96
	2009	11	63.89
	2009	12	29.18
	2010	1	24.6
	2010	2	37.3
	2010	3	45.39
	2010	4	72.68
	2010	5	81.69
	2010	6	8.62
	2010	7	1
	2010	8	9.51
	2010	9	2.66
	2010	10	9.65
	2010	11	4.3
	2010	12	20.07
	2011	1	39.1
	2011	2	28.04
	2011	3	51.58
	2011	4	120.75
	2011	5	43.5
	2011	6	9.48
	2011	7	7.61
	2011	8	6.48
	2011	9	12.23
	2011	10	35.5
	2011	11	43.5
	2011	12	19.68
	2012	1	33.43
	2012	2	18.46
	2012	3	38.06
	2012	4	41.54
	2012	5	40.85
	2012	6	20.49
	2012	7	13.65
	2012	8	1.27
	2012	9	5.88
	2012	10	26.77
	2012	11	68.35
	2012	12	47.94
	2013	1	54.91
	2013	2	25.8
	2013	3	24.28
	2013	4	36.28
	2013	5	56.26
	2013	6	10.42
	2013	7	0.71
	2013	8	1.84
	2013	9	2.5
	2013	10	9.65
	2013	11	61.66
	2013	12	45.7

## Sheet: EWEMBI Temperature 
	Year	Month	EWEMBI Precipitation [0C]
	2003	1	-1.8
	2003	2	-0.45		Reference:	Lange, S.: EartH2Observe, WFDEI and ERA-Interim data Merged and Bias-corrected for ISIMIP (EWEMBI), GFZ Data Services, doi:10.5880/pik.2016.004, 2016.
	2003	3	2.67
	2003	4	7.35
	2003	5	15.57
	2003	6	19.98
	2003	7	24.11
	2003	8	24.98
	2003	9	19.37
	2003	10	15.21
	2003	11	5.61
	2003	12	-0.05
	2004	1	-0.03
	2004	2	0.77
	2004	3	7.12
	2004	4	9.25
	2004	5	14.46
	2004	6	21.18
	2004	7	22.66
	2004	8	24.68
	2004	9	20
	2004	10	14.03
	2004	11	5.48
	2004	12	-3.3
	2005	1	-3.61
	2005	2	-2.8
	2005	3	4.46
	2005	4	10.47
	2005	5	15.27
	2005	6	20.51
	2005	7	25.7
	2005	8	25.01
	2005	9	19.45
	2005	10	13.19
	2005	11	5.67
	2005	12	4.67
	2006	1	-4.31
	2006	2	0.35
	2006	3	6.18
	2006	4	11.4
	2006	5	15.62
	2006	6	22.87
	2006	7	24.41
	2006	8	25
	2006	9	20.04
	2006	10	13.7
	2006	11	3.53
	2006	12	-3.74
	2007	1	-4.95
	2007	2	-0.51
	2007	3	3.81
	2007	4	7.94
	2007	5	16.94
	2007	6	21.55
	2007	7	23.88
	2007	8	24.21
	2007	9	20.75
	2007	10	14.07
	2007	11	5.72
	2007	12	-1.7
	2008	1	-8.26
	2008	2	-3.97
	2008	3	8.95
	2008	4	13.28
	2008	5	15.83
	2008	6	21.44
	2008	7	24.92
	2008	8	25.18
	2008	9	19.93
	2008	10	12.73
	2008	11	5.35
	2008	12	-0.73
	2009	1	-3.38
	2009	2	2.24
	2009	3	4.85
	2009	4	8.4
	2009	5	16.29
	2009	6	20.08
	2009	7	24.17
	2009	8	22.41
	2009	9	17.48
	2009	10	13.18
	2009	11	5.5
	2009	12	1.8
	2010	1	1.64
	2010	2	2.58
	2010	3	7.27
	2010	4	10.51
	2010	5	15.5
	2010	6	22
	2010	7	25.68
	2010	8	24.2
	2010	9	21.17
	2010	10	11.87
	2010	11	5.67
	2010	12	1.08
	2011	1	-2.75
	2011	2	-0.54
	2011	3	4.07
	2011	4	5.64
	2011	5	14.33
	2011	6	20.56
	2011	7	25.75
	2011	8	24.08
	2011	9	19.39
	2011	10	11.4
	2011	11	0.79
	2011	12	-0.82
	2012	1	-3.17
	2012	2	-2.87
	2012	3	1.07
	2012	4	11.64
	2012	5	17.14
	2012	6	22.42
	2012	7	24.38
	2012	8	25.75
	2012	9	19.73
	2012	10	13.84
	2012	11	7.5
	2012	12	0.69
	2013	1	-1.47
	2013	2	0.89
	2013	3	5.9
	2013	4	10.56
	2013	5	15.1
	2013	6	20.11
	2013	7	25.06
	2013	8	23.05
	2013	9	19.48
	2013	10	11.81
	2013	11	6.58
	2013	12	-4.43
