# Supplementary material for: Quantifying the impacts of human water use and climate variations on recent drying of Lake Urmia basin: the value of different sets of spaceborne and in situ data for calibrating a global hydrological model
Source: Copernicus journal article supplement (doi:10.5194/hess-24-1939-2020), 2020-04-17
Supplement: Supplementary file 1 [file hess-24-1939-2020-supplement.zip]

Archive with 3 entries (3 files):
- Data.xlsx
- Supplement.pdf
- hess-24-1939-2020-supplement-title-page.pdf
