# Supplementary material for: Quantifying the impacts of human water use and climate variations on recent drying of Lake Urmia basin: the value of different sets of spaceborne and in situ data for calibrating a global hydrological model
Source: Copernicus journal article supplement (doi:10.5194/hess-24-1939-2020), 2020-04-17
Supplement: Supplementary file 1 [file hess-24-1939-2020-supplement.zip › hess-24-1939-2020-supplement-title-page.pdf]

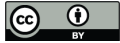

## *Supplement of*

# **Quantifying the impacts of human water use and climate variations on recent drying of Lake Urmia basin: the value of different sets of spaceborne and in situ data for calibrating a global hydrological model**

**Seyed-Mohammad Hosseini-Moghari et al.**

*Correspondence to:* Seyed-Mohammad Hosseini-Moghari ([hosseini\\_sm@igsnr.ac.cn](mailto:hosseini_sm@igsnr.ac.cn))

- [hess-24-1939-2020-supplement-title-page.pdf](#)
- [Data.xlsx](#)
- [Supplement.pdf](#)

The copyright of individual parts of the supplement might differ from the CC BY 4.0 License.
